# Supplementary material for: Quantitative Analysis of Blood to CSF Exchange over 24 Hours Following Intravenous Contrast MRI
Source: Research Square preprint supplement (doi:10.21203/rs.3.rs-8875356/v1), 2026-02-24
Supplement: Supplementary file 1 [file b6771e20b601946c94a74cf9.docx]

**Figure S1** *Phantom Validation of T1 mapping with varying Gadobutrol concentrations*


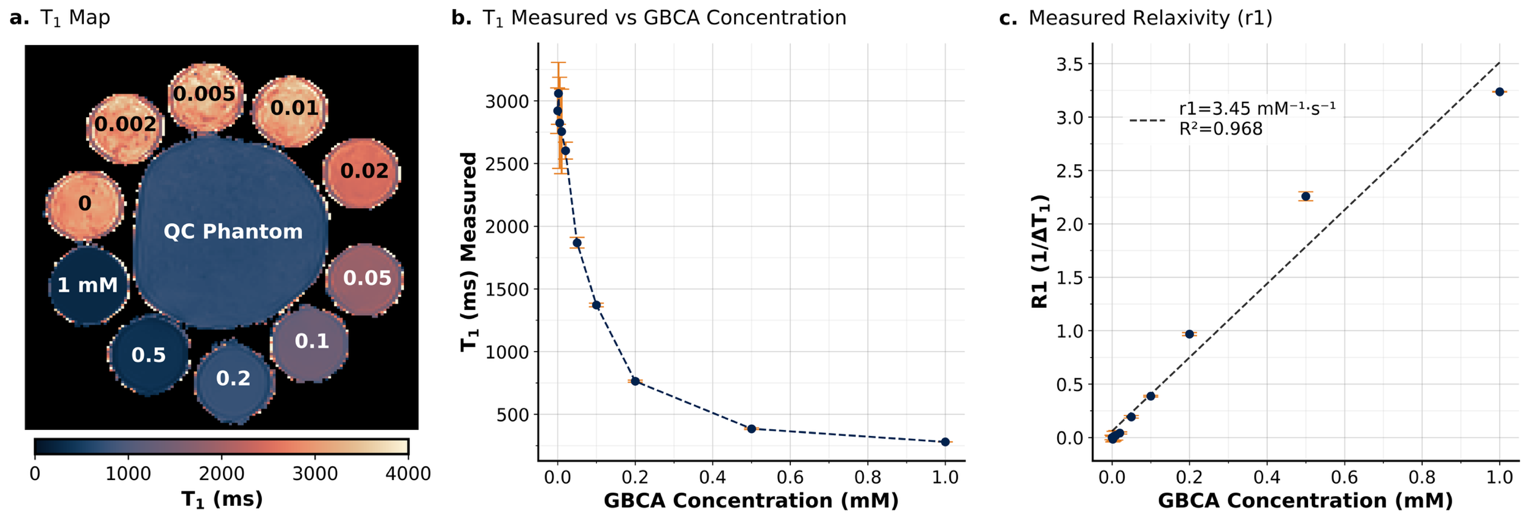


**a.** Representative T1 map of a phantom containing tubes with gadobutrol concentrations ranging from 0 to 1 mM. **b.** Measured T1 values decrease with increasing GBCA concentration. **c.** Linear fit of the relaxation rate (R1) and GBCA concentration. The slope of the line represents the measured relativity (r1) at room temperature.

**Figure S2:** *Quantitative T1 Mapping for secondary ROI analysis*

**
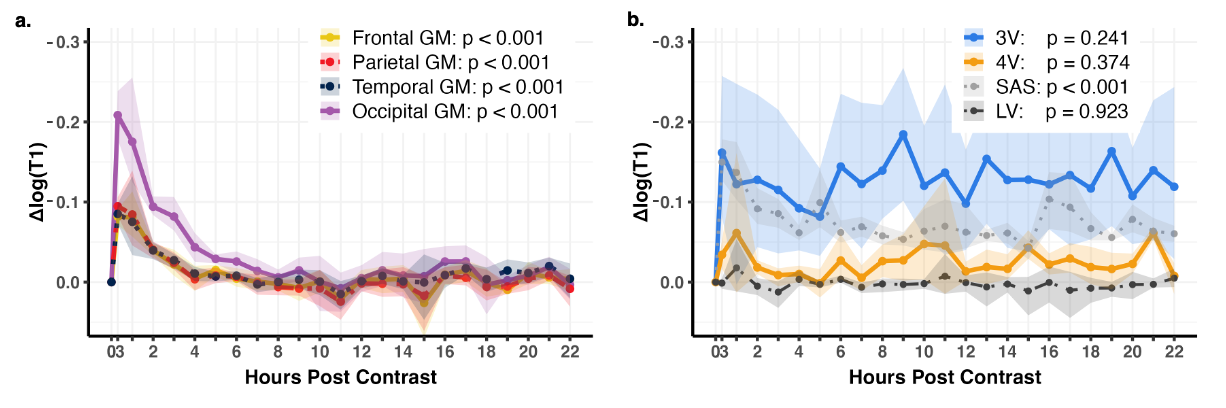
**

**a.** Cortical GM lobar ROIs **b.** 3rd Ventricle (3V) and 4th Ventricle (4V) compared to SAS and LV.

**Figure S3** Similar changes measured with MPRAGE compared to T1 mapping

**
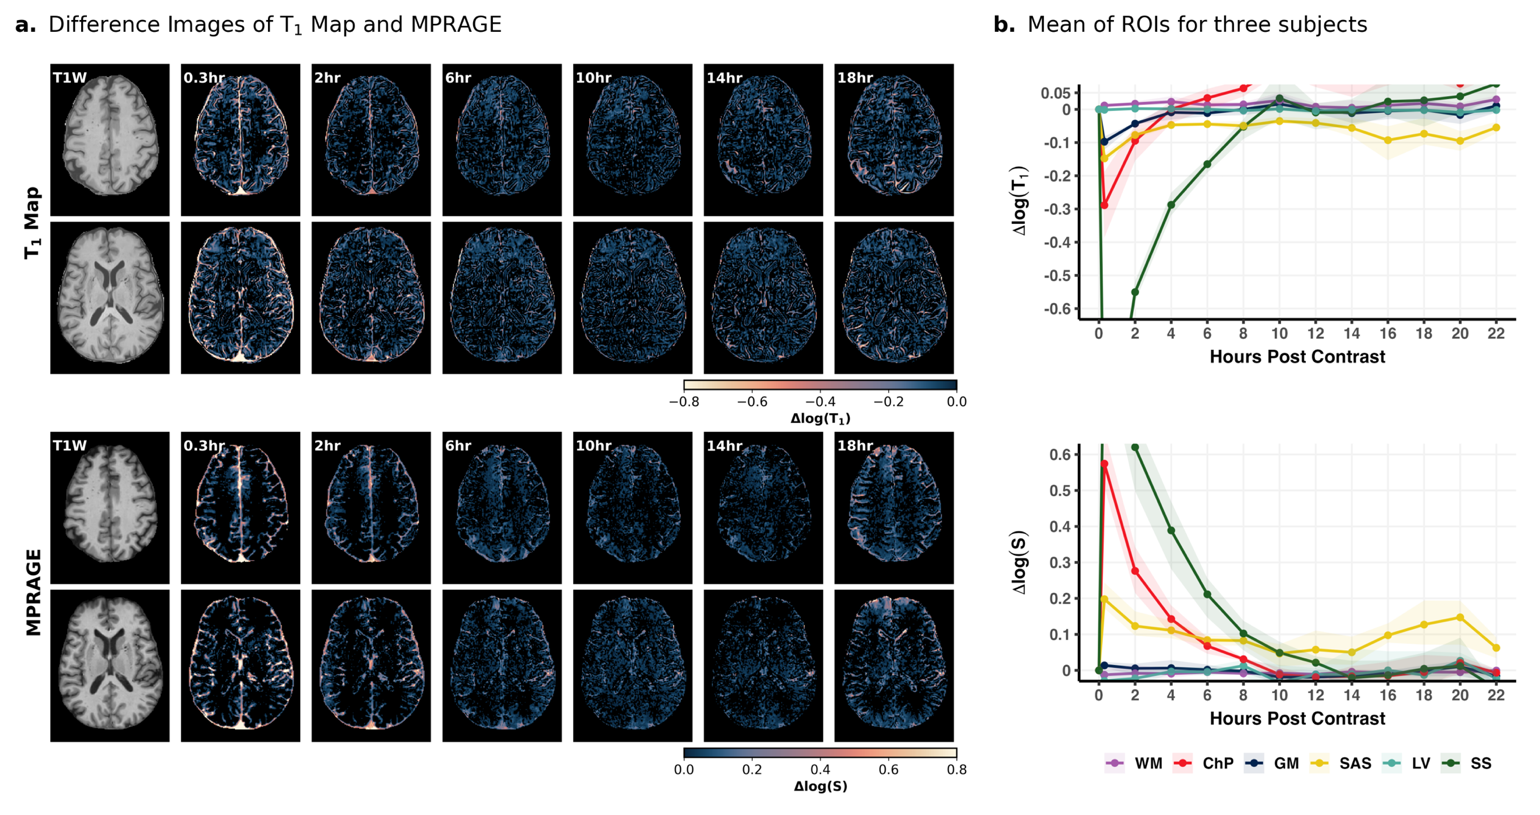
**

**a.** Difference images (Δlog values) of T₁ maps and MPRAGE contrasts at selected post-contrast timepoints relative to baseline. Two representative axial slices from the same participant illustrate contrast-induced changes throughout the brain. Color bars indicate the magnitude and direction of changes in log-transformed T₁ values (top) and signal intensity normalized to the corpus callosum (bottom). **b.** Mean Δlog values within selected regions of interest (ROIs) averaged across three participants with both T₁ mapping and MPRAGE acquisitions. The upper panel depicts Δlog(T₁), while the lower panel shows Δlog(S) (WM: white matter; ChP: choroid plexus; GM: cortical gray matter; SAS: cortical subarachnoid space; LV: lateral ventricle; SS: superior sagittal sinus). Shaded areas represent bootstrapped 95% confidence intervals.

**Table S1** *Fixed Compartment Model Parameters from Literature*

| **Parameter** | **Low** | **High** | **Comments** |
| --- | --- | --- | --- |
| Total CSF Volume | 150 ml (1, 2) | 300 ml (3) |  |
| CSF Production Rate (QCSF) | 430-530 ml/day  (18-22 ml/hr) (1, 4) | 600 ml/day (25 ml/hr) (3) |  |
| Ventricle Volume | 25 ml | 50 ml | 17% of CSF volume (1, 2) |
| CSF Flow Rate  Ventricles 🡪 Cranium SAS | 15 ml/hr | 19 ml/hr | 76% of QCSF.  Based on relative volumes |
| Cranial Subarachnoid Space Volume | 95 ml | 190 ml | (76% of total SAS volume of 125 or 250 ml) |
|  | 1.25 hrs | 2.0 hrs |  |
|  | 6.3 hrs | 10 hrs |  |

References

1. Khasawneh AH, Garling RJ, Harris CA. Cerebrospinal fluid circulation: What do we know and how do we know it? Brain Circulation. 2018;4(1):14-8.

2. Sakka L, Coll G, Chazal J. Anatomy and physiology of cerebrospinal fluid. Eur Ann Otorhinolaryngol Head Neck Dis. 2011;128(6):309-16.

3. Lawley JS, Levine BD, Williams MA, Malm J, Eklund A, Polaner DM, et al. Cerebral spinal fluid dynamics: effect of hypoxia and implications for high-altitude illness. Journal of Applied Physiology. 2016;120(2):251-62.

4. Hladky SB, Barrand MA. Mechanisms of fluid movement into, through and out of the brain: evaluation of the evidence. Fluids and Barriers of the Cns. 2014;11.

***Model Monte-Carlo Sensitivity Analysis***:

Due to the large range in cranial CSF volumes and flowrates reported in the literature, a Monte Carlo Analysis with 1,000 instances was performed on the final four-compartment model, where cranial SAS residence time () and CSF flowrate (QCSF) were varied over their reported ranges (Table S1). A normal distribution of these parameters was assumed (Figure S4, 1,000 points within the normal distribution) using the average of the two “baselines” from Table S5 and setting the standard deviation equal to half of the range.

**Table S2**. Parameter Ranges for Monte Carlo Sensitivity Analysis

| Parameter | Range | Distribution |
| --- | --- | --- |
|  | 5 to 7.6 hours | 6.3 + 1.3 hours |
| CSF Production Rate (QCSF) | 20 to 25 ml/hour | 22.5 + 2.5 ml/hour |

**Figure S4**. Monte Carlo Analysis Input Parameter Distributions

**Figure S4**. Monte Carlo Analysis Input Parameter Distributions, and QCSF. (1,000 instances were simulated). A normal distribution was assumed with average and standard deviations reported in Table S5.

The results of the Monte Carlo analysis are reported in Figure S5, which shows the distribution of the best-fit transport parameters given different combinations of cranial SAS residence time () and CSF flowrate (QCSF) across the range shown in Figure S6. Parameter values (Table 3) lie between those fitted to the two separate CSF volume and flowrate scenario (Table S2). Transport parameter distributions also look normal, with a slight skew of the peak towards lower values. No significant change in results was noted for varying the percentage of CSF that flows to the cranial (versus spinal) SAS.

**Figure S5**.

**Fig S5**. Monte Carlo analysis results using input distributions from Figure S4. Average and standard deviations for transport parameters reported in Table S4.

**Blood Elimination Kinetics**

The average gadobutrol concentrations determined from blood chemistry and compared to concentration calculated from signal for the sagittal sinus (SS) are shown in **Figure S5 A and B**. Excellent agreement of the elimination kinetics is observed between the venous blood ROIs and the blood chemistry, while their magnitudes differ by a factor of 3. The 3D QALAS sequence was not optimized to measure the blood compartment, and this difference may be attributed to flowing blood. Additionally, imaging and blood collection did not occur simultaneously.

The kinetics of elimination of a substance from the blood has been shown to follow exponential decay by a couple of models: single exponential decay and the Toft’s model of double exponential decay. In the Toft’s model, the second term is attributed to the substance partitioning into body tissues then being released back into the blood as the blood concentration decreases over time. The half-life for Gadobutrol (fitted to a single exponential decay) was reported in FDA filing documents to be 1.8 hours.

Single Exponential Decay:

Double Exponential Decay (Tofts):

Where is the initial concentration and t1/2 is the time to reach half the initial concentration, or the “half-life” of the substance.

The parameters for each model that best fit the average venous blood concentration at each time point are reported in **Table S3** and shown graphically in comparison to the data in **Figure S6**. The elimination kinetics strongly agree, while the C0 magnitudes differ between the concentration derived from chemical analysis and that derived from MRI signal. The lower panels (B and D) in **Figure S5** with log y-axis highlight later time points. A single exponential decay forced to t1/2 = 1.8 hours (as reported in literature for gadobutrol) fits the later time points well and lends credibility to the DCE MRI data.

**Table S3**. Best-fit Blood Elimination Parameters for Single and Double Exponential Decay models.

|  | **Blood Chemistry** | **Concentration Calculated from Signal** |
| --- | --- | --- |
| **Single Exponential** |  |  |
| Initial concentration, (mM) | 0.17 ± 0.04 | 0.30 ± 0.02 |
| Half-life, t1/2 (hours) | 0.73 ± 0.16 | 1.08 ± 0.13 |
| rsme | 0.004 | 0.016 |
| **Single Exponential (t1/2 =1.8 hours)** |  |  |
| Initial concentration, (mM) | 0.08 ± 0.01 | 0.24 ± 0.02 |
| Half-life, t1/2 (hours) | 1.8 | 1.8 |
| rsme | 0.003 | 0.013 |
| **Double Exponential Decay** |  |  |
| Initial concentration, (mM) | 0.17 ± 0.04 | 0.30 |
| Fraction, | 0.93 + 0.23 | 0.63 + 0.24 |
| Half-life, t1/2 (hours) | 0.65 + 0.19 | 0.56+ 0.23 |
| Half-life, t1/2 (hours) | 3.9 + 14 | 2.47 + 1.08 |
| rsme | 0.011 | 0.020 |

**Figure S5**.

**C**

**A**


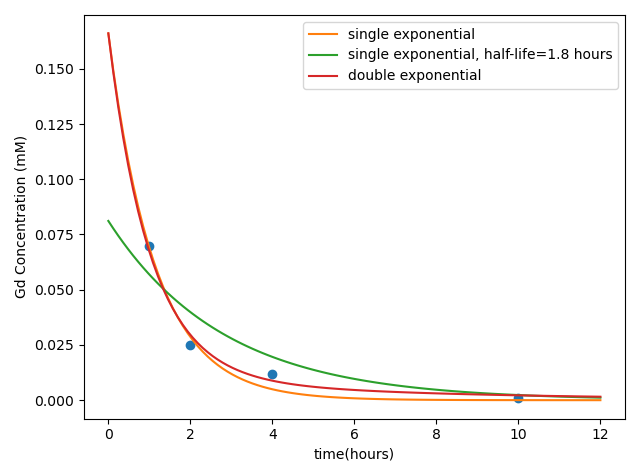

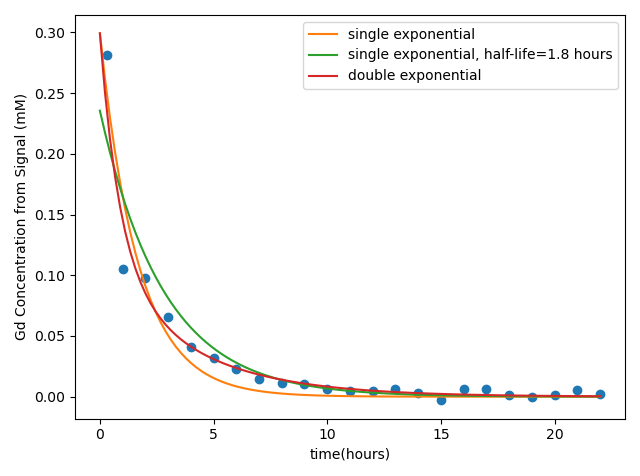


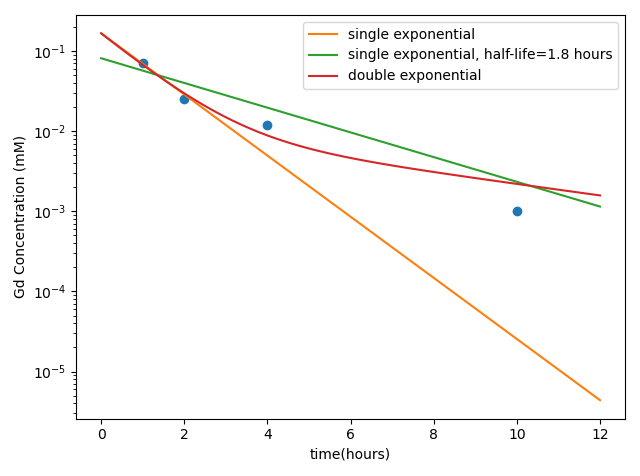

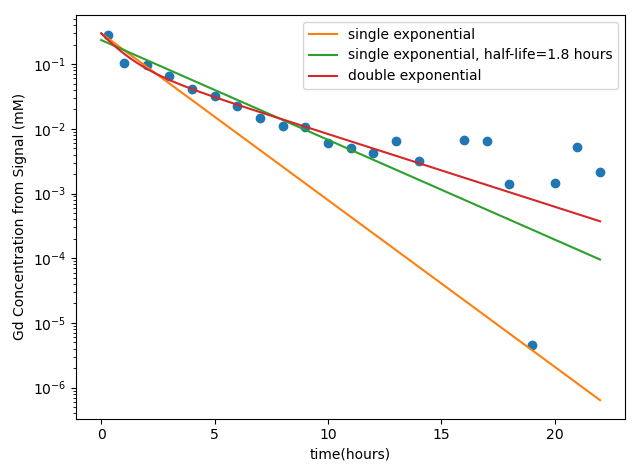


**D**

**B**

**Figure S5**. Least-Squares Regression of Data to single exponential decay, single exponential decay forcing t1/2 = 1.8 hours, and double exponential decay. Blood concentration measured from samples by ICP is shown in panels A and B. Concentration calculated from SS signal is shown in panels C and D.

**Table S4** *Quantitative T1 (ms) values*

| **Type** | **ROI** | **0h** | | | **0.3h** | | | **1h** | | | **2h** | | | **3h** | | | **4h** | | |
| --- | --- | --- | --- | --- | --- | --- | --- | --- | --- | --- | --- | --- | --- | --- | --- | --- | --- | --- | --- |
|  |  | **Mean** | **CI** | **N** | **Mean** | **CI** | **N** | **Mean** | **CI** | **N** | **Mean** | **CI** | **N** | **Mean** | **CI** | **N** | **Mean** | **CI** | **N** |
| *Tissue* | GM | 1410 | (1400 – 1420) | 7 | 1280 | (1270 – 1300) | 7 | 1290 | (1240 – 1350) | 4 | 1350 | (1340 – 1360) | 7 | 1370 | (1350 – 1390) | 5 | 1400 | (1380 – 1420) | 7 |
|  | WM | 743 | (731 – 754) | 7 | 751 | (738 – 764) | 7 | 731 | (710 – 754) | 4 | 754 | (740 – 766) | 7 | 752 | (732 – 771) | 5 | 761 | (744 – 777) | 7 |
| *Blood* | ChP | 1540 | (1470 – 1590) | 7 | 1360 | (1130 – 1520) | 7 | 1300 | (1200 – 1410) | 4 | 1410 | (1310 – 1500) | 7 | 1430 | (1360 – 1500) | 5 | 1560 | (1460 – 1640) | 7 |
|  | SS | 1480 | (1420 – 1540) | 7 | 515 | (453 – 559) | 7 | 714 | (676 – 754) | 4 | 887 | (841 – 933) | 7 | 1040 | (966 – 1110) | 5 | 1180 | (1100 – 1250) | 7 |
| *CSF* | SAS | 4030 | (4010 – 4050) | 7 | 3470 | (3380 – 3590) | 7 | 3500 | (3370 – 3630) | 4 | 3680 | (3600 – 3790) | 7 | 3690 | (3620 – 3780) | 5 | 3790 | (3740 – 3830) | 7 |
|  | LV | 4170 | (4130 – 4240) | 7 | 4180 | (4140 – 4230) | 7 | 4130 | (4020 – 4290) | 4 | 4190 | (4160 – 4230) | 7 | 4210 | (4180 – 4240) | 5 | 4160 | (4090 – 4270) | 7 |
| Superior Sagittal Sinus (SS), Choroid Plexus (ChP), Cortical Subarachnoid Space (SAS), Lateral Ventricle (LV), Cortical Gray Matter (GM), Cerebral White Matter (WM) | | | | | | | | | | | | | | | | | | | |

| **Type** | **ROI** | **5h** | | | **6h** | | | **7h** | | | **8h** | | | **9h** | | | **10h** | | |
| --- | --- | --- | --- | --- | --- | --- | --- | --- | --- | --- | --- | --- | --- | --- | --- | --- | --- | --- | --- |
|  |  | **Mean** | **CI** | **N** | **Mean** | **CI** | **N** | **Mean** | **CI** | **N** | **Mean** | **CI** | **N** | **Mean** | **CI** | **N** | **Mean** | **CI** | **N** |
| *Tissue* | GM | 1390 | (1380 – 1400) | 5 | 1400 | (1390 – 1410) | 7 | 1410 | (1400 – 1420) | 5 | 1410 | (1400 – 1420) | 7 | 1410 | (1390 – 1430) | 5 | 1410 | (1380 – 1440) | 7 |
|  | WM | 756 | (734 – 775) | 5 | 757 | (741 – 769) | 7 | 759 | (738 – 776) | 5 | 757 | (743 – 770) | 7 | 759 | (735 – 780) | 5 | 758 | (741 – 776) | 7 |
| *Blood* | ChP | 1540 | (1480 – 1600) | 5 | 1600 | (1510 – 1670) | 7 | 1630 | (1570 – 1680) | 5 | 1650 | (1560 – 1720) | 7 | 1620 | (1590 – 1670) | 5 | 1680 | (1590 – 1760) | 7 |
|  | SS | 1250 | (1120 – 1350) | 5 | 1300 | (1240 – 1360) | 7 | 1380 | (1290 – 1470) | 5 | 1410 | (1340 – 1480) | 7 | 1430 | (1350 – 1510) | 5 | 1480 | (1410 – 1560) | 7 |
| *CSF* | SAS | 3640 | (3520 – 3760) | 5 | 3790 | (3730 – 3850) | 7 | 3750 | (3690 – 3810) | 5 | 3800 | (3750 – 3860) | 7 | 3810 | (3780 – 3860) | 5 | 3780 | (3690 – 3880) | 7 |
|  | LV | 4170 | (4120 – 4260) | 5 | 4160 | (4110 – 4250) | 7 | 4180 | (4140 – 4250) | 5 | 4180 | (4160 – 4220) | 7 | 4170 | (4120 – 4240) | 5 | 4180 | (4150 – 4230) | 7 |
| Superior Sagittal Sinus (SS), Choroid Plexus (ChP), Cortical Subarachnoid Space (SAS), Lateral Ventricle (LV), Cortical Gray Matter (GM), Cerebral White Matter (WM) | | | | | | | | | | | | | | | | | | | |

**Table S4** *Cont.*

| **Type** | **ROI** | **11h** | | | **12h** | | | **13h** | | | **14h** | | | **15h** | | | **16h** | | |
| --- | --- | --- | --- | --- | --- | --- | --- | --- | --- | --- | --- | --- | --- | --- | --- | --- | --- | --- | --- |
|  |  | **Mean** | **CI** | **N** | **Mean** | **CI** | **N** | **Mean** | **CI** | **N** | **Mean** | **CI** | **N** | **Mean** | **CI** | **N** | **Mean** | **CI** | **N** |
| *Tissue* | GM | 1440 | (1410 – 1460) | 5 | 1410 | (1390 – 1420) | 7 | 1400 | (1370 – 1430) | 5 | 1410 | (1390 – 1430) | 6 | 1430 | (1360 – 1490) | 4 | 1400 | (1380 – 1410) | 6 |
|  | WM | 770 | (751 – 787) | 5 | 752 | (737 – 764) | 7 | 750 | (726 – 771) | 5 | 753 | (734 – 768) | 6 | 767 | (737 – 798) | 4 | 753 | (739 – 766) | 6 |
| *Blood* | ChP | 1690 | (1640 – 1740) | 5 | 1700 | (1580 – 1770) | 7 | 1660 | (1610 – 1710) | 5 | 1710 | (1620 – 1780) | 6 | 1710 | (1540 – 1820) | 4 | 1700 | (1610 – 1760) | 6 |
|  | SS | 1500 | (1420 – 1600) | 5 | 1490 | (1420 – 1540) | 7 | 1480 | (1420 – 1540) | 5 | 1470 | (1390 – 1550) | 6 | 1510 | (1430 – 1590) | 4 | 1460 | (1400 – 1540) | 6 |
| *CSF* | SAS | 3750 | (3630 – 3900) | 5 | 3790 | (3710 – 3930) | 7 | 3790 | (3760 – 3830) | 5 | 3790 | (3720 – 3860) | 6 | 3850 | (3830 – 3870) | 4 | 3640 | (3490 – 3790) | 6 |
|  | LV | 4130 | (4050 – 4220) | 5 | 4180 | (4140 – 4210) | 7 | 4180 | (4150 – 4220) | 5 | 4180 | (4140 – 4230) | 6 | 4190 | (4170 – 4210) | 4 | 4170 | (4140 – 4220) | 6 |
| Superior Sagittal Sinus (SS), Choroid Plexus (ChP), Cortical Subarachnoid Space (SAS), Lateral Ventricle (LV), Cortical Gray Matter (GM), Cerebral White Matter (WM) | | | | | | | | | | | | | | | | | | | |

| **Type** | **ROI** | **17h** | | | **18h** | | | **19h** | | | **20h** | | | **21h** | | | **22h** | | |
| --- | --- | --- | --- | --- | --- | --- | --- | --- | --- | --- | --- | --- | --- | --- | --- | --- | --- | --- | --- |
|  |  | **Mean** | **CI** | **N** | **Mean** | **CI** | **N** | **Mean** | **CI** | **N** | **Mean** | **CI** | **N** | **Mean** | **CI** | **N** | **Mean** | **CI** | **N** |
| *Tissue* | GM | 1390 | (1370 – 1410) | 4 | 1410 | (1380 – 1440) | 6 | 1410 | (1400 – 1430) | 4 | 1400 | (1380 – 1420) | 6 | 1390 | (1380 – 1410) | 4 | 1410 | (1390 – 1430) | 5 |
|  | WM | 750 | (726 – 772) | 4 | 757 | (736 – 779) | 6 | 753 | (729 – 776) | 4 | 753 | (735 – 770) | 6 | 749 | (726 – 772) | 4 | 756 | (735 – 777) | 5 |
| *Blood* | ChP | 1650 | (1630 – 1680) | 4 | 1720 | (1640 – 1790) | 6 | 1660 | (1620 – 1700) | 4 | 1680 | (1590 – 1760) | 6 | 1630 | (1610 – 1660) | 4 | 1640 | (1570 – 1700) | 5 |
|  | SS | 1450 | (1380 – 1530) | 4 | 1490 | (1430 – 1560) | 6 | 1490 | (1400 – 1580) | 4 | 1510 | (1430 – 1580) | 6 | 1460 | (1340 – 1550) | 4 | 1480 | (1390 – 1570) | 5 |
| *CSF* | SAS | 3660 | (3540 – 3800) | 4 | 3770 | (3700 – 3850) | 6 | 3800 | (3760 – 3850) | 4 | 3730 | (3670 – 3790) | 6 | 3770 | (3720 – 3870) | 4 | 3790 | (3750 – 3850) | 5 |
|  | LV | 4190 | (4160 – 4240) | 4 | 4200 | (4180 – 4220) | 6 | 4180 | (4130 – 4260) | 4 | 4180 | (4150 – 4220) | 6 | 4160 | (4090 – 4270) | 4 | 4140 | (4050 – 4280) | 5 |
| Superior Sagittal Sinus (SS), Choroid Plexus (ChP), Cortical Subarachnoid Space (SAS), Lateral Ventricle (LV), Cortical Gray Matter (GM), Cerebral White Matter (WM) | | | | | | | | | | | | | | | | | | | |

**Table S5** *GBCA Concentration from Quantitative T1 (ms)*

| **Type** | **ROI** | **0.3h** | | | **1h** | | | **2h** | | | **3h** | | | **4h** | | |
| --- | --- | --- | --- | --- | --- | --- | --- | --- | --- | --- | --- | --- | --- | --- | --- | --- |
|  |  | **Mean** | **CI** | **N** | **Mean** | **CI** | **N** | **Mean** | **CI** | **N** | **Mean** | **CI** | **N** | **Mean** | **CI** | **N** |
| *Tissue* | GM | 0.016 | (0.014 – 0.018) | 7 | 0.014 | (0.006 – 0.018) | 4 | 0.007 | (0.006 – 0.008) | 7 | 0.004 | (0.002 – 0.006) | 5 | 0.002 | (2.71e-05 – 0.003) | 7 |
|  | WM | -0.003 | (-0.003 – -0.002) | 7 | 0.002 | (-0.008 – 0.008) | 4 | -0.004 | (-0.005 – -0.003) | 7 | -0.003 | (-0.006 – -7.64e-04) | 5 | -0.006 | (-0.009 – -0.004) | 7 |
| *Blood* | ChP | 0.043 | (0.029 – 0.059) | 7 | 0.033 | (0.018 – 0.05) | 4 | 0.016 | (0.009 – 0.023) | 7 | 0.01 | (0.003 – 0.019) | 5 | -3.54e-04 | (-0.004 – 0.004) | 7 |
|  | SS | 0.27 | (0.236 – 0.314) | 7 | 0.15 | (0.137 – 0.163) | 4 | 0.093 | (0.084 – 0.102) | 7 | 0.059 | (0.046 – 0.069) | 5 | 0.036 | (0.028 – 0.045) | 7 |
| *CSF* | SAS | 0.011 | (0.009 – 0.013) | 7 | 0.009 | (0.006 – 0.012) | 4 | 0.005 | (0.004 – 0.007) | 7 | 0.005 | (0.004 – 0.006) | 5 | 0.003 | (0.003 – 0.004) | 7 |
|  | LV | -1.45e-04 | (-5.21e-04 – 3.56e-04) | 7 | 0.001 | (-0.001 – 0.003) | 4 | -3.33e-04 | (-8.98e-04 – 4.30e-04) | 7 | -7.30e-04 | (-0.002 – 4.66e-04) | 5 | 1.48e-04 | (-3.54e-04 – 5.73e-04) | 7 |
| Superior Sagittal Sinus (SS), Choroid Plexus (ChP), Cortical Subarachnoid Space (SAS), Lateral Ventricle (LV), Cortical Gray Matter (GM), Cerebral White Matter (WM) | | | | | | | | | | | | | | | | |

| **Type** | **ROI** | **5h** | | | **6h** | | | **7h** | | | **8h** | | | **9h** | | |
| --- | --- | --- | --- | --- | --- | --- | --- | --- | --- | --- | --- | --- | --- | --- | --- | --- |
|  |  | **Mean** | **CI** | **N** | **Mean** | **CI** | **N** | **Mean** | **CI** | **N** | **Mean** | **CI** | **N** | **Mean** | **CI** | **N** |
| *Tissue* | GM | 0.002 | (0.001 – 0.003) | 5 | 0.002 | (4.72e-04 – 0.002) | 7 | 4.25e-04 | (-2.73e-04 – 0.001) | 5 | 1.87e-04 | (-8.28e-04 – 0.001) | 7 | 3.90e-05 | (-0.002 – 0.001) | 5 |
|  | WM | -0.005 | (-0.007 – -0.003) | 5 | -0.005 | (-0.007 – -0.003) | 7 | -0.006 | (-0.007 – -0.005) | 5 | -0.005 | (-0.007 – -0.004) | 7 | -0.006 | (-0.008 – -0.004) | 5 |
| *Blood* | ChP | -0.002 | (-0.007 – 0.004) | 5 | -0.005 | (-0.008 – -3.47e-04) | 7 | -0.009 | (-0.013 – -0.004) | 5 | -0.009 | (-0.011 – -0.006) | 7 | -0.009 | (-0.013 – -0.006) | 5 |
|  | SS | 0.026 | (0.017 – 0.036) | 5 | 0.019 | (0.014 – 0.023) | 7 | 0.01 | (0.004 – 0.016) | 5 | 0.006 | (0.002 – 0.01) | 7 | 0.004 | (0.001 – 0.007) | 5 |
| *CSF* | SAS | 0.006 | (0.003 – 0.008) | 5 | 0.003 | (0.002 – 0.004) | 7 | 0.003 | (0.003 – 0.004) | 5 | 0.003 | (0.002 – 0.003) | 7 | 0.002 | (0.002 – 0.003) | 5 |
|  | LV | -2.64e-04 | (-5.81e-04 – 6.02e-05) | 5 | 1.09e-04 | (-6.88e-05 – 2.91e-04) | 7 | -4.27e-04 | (-8.10e-04 – 1.10e-04) | 5 | -1.97e-04 | (-6.04e-04 – 4.39e-04) | 7 | -2.54e-04 | (-7.14e-04 – 3.16e-04) | 5 |
| Superior Sagittal Sinus (SS), Choroid Plexus (ChP), Cortical Subarachnoid Space (SAS), Lateral Ventricle (LV), Cortical Gray Matter (GM), Cerebral White Matter (WM) | | | | | | | | | | | | | | | | |

**Table S5** *Cont.*

| **Type** | **ROI** | **10h** | | | **11h** | | | **12h** | | | **13h** | | | **14h** | | |
| --- | --- | --- | --- | --- | --- | --- | --- | --- | --- | --- | --- | --- | --- | --- | --- | --- |
|  |  | **Mean** | **CI** | **N** | **Mean** | **CI** | **N** | **Mean** | **CI** | **N** | **Mean** | **CI** | **N** | **Mean** | **CI** | **N** |
| *Tissue* | GM | 4.14e-04 | (-0.002 – 0.003) | 7 | -0.002 | (-0.004 – 1.86e-05) | 5 | 8.59e-04 | (-2.45e-04 – 0.002) | 7 | 0.001 | (-0.001 – 0.003) | 5 | 8.34e-04 | (-0.001 – 0.003) | 6 |
|  | WM | -0.005 | (-0.008 – -0.003) | 7 | -0.01 | (-0.011 – -0.009) | 5 | -0.003 | (-0.005 – -0.001) | 7 | -0.003 | (-0.006 – 6.95e-04) | 5 | -0.003 | (-0.007 – 1.77e-04) | 6 |
| *Blood* | ChP | -0.011 | (-0.016 – -0.007) | 7 | -0.014 | (-0.018 – -0.01) | 5 | -0.012 | (-0.015 – -0.008) | 7 | -0.011 | (-0.015 – -0.007) | 5 | -0.013 | (-0.018 – -0.009) | 6 |
|  | SS | 6.89e-05 | (-0.005 – 0.006) | 7 | -0.002 | (-0.005 – 0.001) | 5 | -8.61e-04 | (-0.005 – 0.003) | 7 | -7.47e-04 | (-0.002 – 4.76e-04) | 5 | -8.14e-04 | (-0.004 – 0.002) | 6 |
| *CSF* | SAS | 0.003 | (0.001 – 0.005) | 7 | 0.003 | (0.001 – 0.005) | 5 | 0.003 | (6.62e-04 – 0.004) | 7 | 0.003 | (0.002 – 0.003) | 5 | 0.003 | (0.002 – 0.004) | 6 |
|  | LV | -1.69e-04 | (-5.30e-04 – 2.83e-04) | 7 | 3.51e-04 | (-0.001 – 0.002) | 5 | -1.17e-04 | (-6.54e-04 – 5.80e-04) | 7 | -4.13e-04 | (-0.001 – 0.001) | 5 | -2.23e-04 | (-7.60e-04 – 4.36e-04) | 6 |
| Superior Sagittal Sinus (SS), Choroid Plexus (ChP), Cortical Subarachnoid Space (SAS), Lateral Ventricle (LV), Cortical Gray Matter (GM), Cerebral White Matter (WM) | | | | | | | | | | | | | | | | |

| **Type** | **ROI** | **15h** | | | **16h** | | | **17h** | | | **18h** | | | **19h** | | |
| --- | --- | --- | --- | --- | --- | --- | --- | --- | --- | --- | --- | --- | --- | --- | --- | --- |
|  |  | **Mean** | **CI** | **N** | **Mean** | **CI** | **N** | **Mean** | **CI** | **N** | **Mean** | **CI** | **N** | **Mean** | **CI** | **N** |
| *Tissue* | GM | -0.001 | (-0.006 – 0.005) | 4 | 0.002 | (6.20e-04 – 0.004) | 6 | 0.003 | (9.31e-04 – 0.004) | 4 | 4.31e-04 | (-0.002 – 0.003) | 6 | 3.60e-04 | (-5.99e-04 – 0.002) | 4 |
|  | WM | -0.008 | (-0.017 – 0.005) | 4 | -0.003 | (-0.004 – -0.001) | 6 | -0.002 | (-0.005 – 8.97e-04) | 4 | -0.004 | (-0.008 – -0.001) | 6 | -0.003 | (-0.005 – -0.001) | 4 |
| *Blood* | ChP | -0.015 | (-0.022 – -0.002) | 4 | -0.013 | (-0.015 – -0.01) | 6 | -0.012 | (-0.014 – -0.009) | 4 | -0.014 | (-0.017 – -0.011) | 6 | -0.012 | (-0.016 – -0.008) | 4 |
|  | SS | -0.005 | (-0.009 – -9.97e-04) | 4 | 9.03e-04 | (-0.004 – 0.006) | 6 | -1.40e-04 | (-0.003 – 0.002) | 4 | -0.002 | (-0.009 – 0.004) | 6 | -0.003 | (-0.005 – -9.16e-04) | 4 |
| *CSF* | SAS | 0.002 | (9.82e-04 – 0.002) | 4 | 0.006 | (0.003 – 0.008) | 6 | 0.005 | (0.002 – 0.007) | 4 | 0.003 | (0.002 – 0.004) | 6 | 0.002 | (0.002 – 0.003) | 4 |
|  | LV | -6.96e-04 | (-0.002 – 9.65e-04) | 4 | -7.92e-05 | (-0.001 – 0.001) | 6 | -6.30e-04 | (-0.002 – 0.001) | 4 | -4.82e-04 | (-0.001 – 6.29e-04) | 6 | -5.07e-04 | (-0.001 – 2.73e-04) | 4 |
| Superior Sagittal Sinus (SS), Choroid Plexus (ChP), Cortical Subarachnoid Space (SAS), Lateral Ventricle (LV), Cortical Gray Matter (GM), Cerebral White Matter (WM) | | | | | | | | | | | | | | | | |

**Table S6** *Post-hoc results for all ROIs*

| Post-hoc Dunnett Test — Cerebral WM (WM) | | | | | |
| --- | --- | --- | --- | --- | --- |
| Comparison | Mean Difference | Std. Error | DF | t-value | p-value |
| 0.3 h | 0.01050 | 0.00682 | 105.0001 | 1.540 | **0.75** |
| 1 h | -0.00325 | 0.00807 | 105.0611 | -0.402 | **1** |
| 2 h | 0.01510 | 0.00682 | 105.0001 | 2.210 | **0.32** |
| 3 h | 0.01290 | 0.00752 | 105.0526 | 1.710 | **0.64** |
| 4 h | 0.02360 | 0.00682 | 105.0001 | 3.460 | **<0.05** |
| 5 h | 0.01880 | 0.00752 | 105.0526 | 2.500 | **0.19** |
| 6 h | 0.01830 | 0.00682 | 105.0001 | 2.690 | **0.12** |
| 7 h | 0.02190 | 0.00752 | 105.0526 | 2.920 | **0.069** |
| 8 h | 0.01910 | 0.00682 | 105.0001 | 2.800 | **0.093** |
| 9 h | 0.02190 | 0.00752 | 105.0526 | 2.910 | **0.071** |
| 10 h | 0.02060 | 0.00682 | 105.0001 | 3.020 | **0.052** |
| 11 h | 0.03730 | 0.00752 | 105.0526 | 4.960 | **<0.001** |
| 12 h | 0.01180 | 0.00682 | 105.0001 | 1.740 | **0.63** |
| 13 h | 0.01060 | 0.00752 | 105.0526 | 1.410 | **0.82** |
| 14 h | 0.01060 | 0.00712 | 105.0183 | 1.490 | **0.78** |
| 15 h | 0.02870 | 0.00807 | 105.0604 | 3.560 | **<0.05** |
| 16 h | 0.01020 | 0.00712 | 105.0183 | 1.440 | **0.81** |
| 17 h | 0.00591 | 0.00807 | 105.0604 | 0.732 | **0.99** |
| 18 h | 0.01610 | 0.00712 | 105.0183 | 2.270 | **0.29** |
| 19 h | 0.00981 | 0.00807 | 105.0604 | 1.220 | **0.9** |
| 20 h | 0.01000 | 0.00712 | 105.0183 | 1.410 | **0.82** |
| 21 h | 0.00529 | 0.00807 | 105.0604 | 0.655 | **1** |
| 22 h | 0.01360 | 0.00751 | 105.0404 | 1.810 | **0.58** |

**Table S6** *Cont*

| Post-hoc Dunnett Test — Cortical GM (GM) | | | | | |
| --- | --- | --- | --- | --- | --- |
| Comparison | Mean Difference | Std. Error | DF | t-value | p-value |
| 0.3 h | -0.093200 | 0.00895 | 105.0023 | -10.4000 | **<0.001** |
| 1 h | -0.086300 | 0.01060 | 105.2843 | -8.1500 | **<0.001** |
| 2 h | -0.044000 | 0.00895 | 105.0023 | -4.9100 | **<0.001** |
| 3 h | -0.029200 | 0.00987 | 105.2427 | -2.9500 | **0.063** |
| 4 h | -0.009390 | 0.00895 | 105.0023 | -1.0500 | **0.95** |
| 5 h | -0.013400 | 0.00987 | 105.2427 | -1.3600 | **0.85** |
| 6 h | -0.008230 | 0.00895 | 105.0023 | -0.9190 | **0.98** |
| 7 h | -0.001250 | 0.00987 | 105.2427 | -0.1270 | **1** |
| 8 h | 0.000974 | 0.00895 | 105.0023 | 0.1090 | **1** |
| 9 h | 0.001410 | 0.00987 | 105.2427 | 0.1420 | **1** |
| 10 h | 0.000178 | 0.00895 | 105.0023 | 0.0199 | **1** |
| 11 h | 0.018300 | 0.00987 | 105.2427 | 1.8500 | **0.55** |
| 12 h | -0.002650 | 0.00895 | 105.0023 | -0.2960 | **1** |
| 13 h | -0.005390 | 0.00987 | 105.2427 | -0.5460 | **1** |
| 14 h | -0.004410 | 0.00934 | 105.0874 | -0.4720 | **1** |
| 15 h | 0.010000 | 0.01060 | 105.2844 | 0.9480 | **0.97** |
| 16 h | -0.012300 | 0.00934 | 105.0874 | -1.3200 | **0.86** |
| 17 h | -0.018200 | 0.01060 | 105.2844 | -1.7200 | **0.64** |
| 18 h | -0.001680 | 0.00934 | 105.0874 | -0.1800 | **1** |
| 19 h | -0.003830 | 0.01060 | 105.2844 | -0.3610 | **1** |
| 20 h | -0.012200 | 0.00934 | 105.0874 | -1.3100 | **0.87** |
| 21 h | -0.016100 | 0.01060 | 105.2844 | -1.5200 | **0.76** |
| 22 h | -0.005230 | 0.00986 | 105.1902 | -0.5300 | **1** |

**Table S6** *Cont*

| Post-hoc Dunnett Test — Lateral Ventricle (LV) | | | | | |
| --- | --- | --- | --- | --- | --- |
| Comparison | Mean Difference | Std. Error | DF | t-value | p-value |
| 0.3 h | 0.001260 | 0.00817 | 105.0033 | 0.1540 | **1.00** |
| 1 h | -0.014300 | 0.00966 | 105.3366 | -1.4800 | **0.79** |
| 2 h | 0.005040 | 0.00817 | 105.0033 | 0.6170 | **1.00** |
| 3 h | 0.010300 | 0.00901 | 105.2868 | 1.1400 | **0.93** |
| 4 h | -0.003430 | 0.00817 | 105.0033 | -0.4200 | **1.00** |
| 5 h | 0.000760 | 0.00901 | 105.2868 | 0.0844 | **1.00** |
| 6 h | -0.003510 | 0.00817 | 105.0033 | -0.4300 | **1.00** |
| 7 h | 0.004300 | 0.00901 | 105.2868 | 0.4770 | **1.00** |
| 8 h | 0.002240 | 0.00817 | 105.0033 | 0.2750 | **1.00** |
| 9 h | 0.000823 | 0.00901 | 105.2868 | 0.0914 | **1.00** |
| 10 h | 0.001900 | 0.00817 | 105.0033 | 0.2330 | **1.00** |
| 11 h | -0.009470 | 0.00901 | 105.2868 | -1.0500 | **0.95** |
| 12 h | 0.000628 | 0.00817 | 105.0033 | 0.0769 | **1.00** |
| 13 h | 0.003940 | 0.00901 | 105.2868 | 0.4370 | **1.00** |
| 14 h | 0.000903 | 0.00852 | 105.1041 | 0.1060 | **1.00** |
| 15 h | 0.006140 | 0.00966 | 105.3375 | 0.6350 | **1.00** |
| 16 h | -0.001100 | 0.00852 | 105.1041 | -0.1300 | **1.00** |
| 17 h | 0.005270 | 0.00966 | 105.3375 | 0.5460 | **1.00** |
| 18 h | 0.006130 | 0.00852 | 105.1041 | 0.7200 | **0.99** |
| 19 h | 0.002410 | 0.00966 | 105.3375 | 0.2500 | **1.00** |
| 20 h | 0.001620 | 0.00852 | 105.1041 | 0.1900 | **1.00** |
| 21 h | -0.002180 | 0.00966 | 105.3375 | -0.2260 | **1.00** |
| 22 h | -0.007920 | 0.00900 | 105.2258 | -0.8800 | **0.98** |

**Table S6** *Cont*

| Post-hoc Dunnett Test — Cortical Subarachnoid Space (SAS) | | | | | |
| --- | --- | --- | --- | --- | --- |
| Comparison | Mean Difference | Std. Error | DF | t-value | p-value |
| 0.3 h | -0.1500 | 0.0142 | 105.0063 | -10.60 | **<0.001** |
| 1 h | -0.1340 | 0.0167 | 105.4567 | -8.02 | **<0.001** |
| 2 h | -0.0915 | 0.0142 | 105.0063 | -6.46 | **<0.001** |
| 3 h | -0.0831 | 0.0156 | 105.3873 | -5.33 | **<0.001** |
| 4 h | -0.0616 | 0.0142 | 105.0063 | -4.35 | **<0.001** |
| 5 h | -0.0968 | 0.0156 | 105.3873 | -6.20 | **<0.001** |
| 6 h | -0.0619 | 0.0142 | 105.0063 | -4.38 | **<0.001** |
| 7 h | -0.0668 | 0.0156 | 105.3873 | -4.28 | **<0.001** |
| 8 h | -0.0578 | 0.0142 | 105.0063 | -4.08 | **<0.01** |
| 9 h | -0.0510 | 0.0156 | 105.3873 | -3.27 | **<0.05** |
| 10 h | -0.0637 | 0.0142 | 105.0063 | -4.50 | **<0.001** |
| 11 h | -0.0673 | 0.0156 | 105.3873 | -4.31 | **<0.001** |
| 12 h | -0.0623 | 0.0142 | 105.0063 | -4.40 | **<0.001** |
| 13 h | -0.0558 | 0.0156 | 105.3873 | -3.58 | **<0.05** |
| 14 h | -0.0600 | 0.0148 | 105.1434 | -4.06 | **<0.01** |
| 15 h | -0.0373 | 0.0167 | 105.4604 | -2.23 | **0.31** |
| 16 h | -0.1020 | 0.0148 | 105.1434 | -6.93 | **<0.001** |
| 17 h | -0.0887 | 0.0167 | 105.4604 | -5.29 | **<0.001** |
| 18 h | -0.0656 | 0.0148 | 105.1434 | -4.44 | **<0.001** |
| 19 h | -0.0508 | 0.0167 | 105.4604 | -3.03 | **0.051** |
| 20 h | -0.0771 | 0.0148 | 105.1434 | -5.22 | **<0.001** |
| 21 h | -0.0588 | 0.0167 | 105.4604 | -3.51 | **<0.05** |
| 22 h | -0.0592 | 0.0156 | 105.3082 | -3.80 | **<0.01** |

**Table S6** *Cont*

| Post-hoc Dunnett Test — Superior Sagittal Sinus (SS) | | | | | |
| --- | --- | --- | --- | --- | --- |
| Comparison | Mean Difference | Std. Error | DF | t-value | p-value |
| 0.3 h | -1.06000 | 0.0319 | 105.0031 | -33.4000 | **<0.001** |
| 1 h | -0.74300 | 0.0377 | 105.3247 | -19.7000 | **<0.001** |
| 2 h | -0.51300 | 0.0319 | 105.0031 | -16.1000 | **<0.001** |
| 3 h | -0.36300 | 0.0352 | 105.2768 | -10.3000 | **<0.001** |
| 4 h | -0.23000 | 0.0319 | 105.0031 | -7.2000 | **<0.001** |
| 5 h | -0.17700 | 0.0352 | 105.2768 | -5.0400 | **<0.001** |
| 6 h | -0.13000 | 0.0319 | 105.0031 | -4.0700 | **<0.01** |
| 7 h | -0.07880 | 0.0352 | 105.2768 | -2.2400 | **0.31** |
| 8 h | -0.04680 | 0.0319 | 105.0031 | -1.4700 | **0.79** |
| 9 h | -0.04040 | 0.0352 | 105.2768 | -1.1500 | **0.93** |
| 10 h | -0.00120 | 0.0319 | 105.0031 | -0.0376 | **1** |
| 11 h | 0.00742 | 0.0352 | 105.2768 | 0.2110 | **1** |
| 12 h | 0.00337 | 0.0319 | 105.0031 | 0.1060 | **1** |
| 13 h | -0.00554 | 0.0352 | 105.2768 | -0.1580 | **1** |
| 14 h | 0.00677 | 0.0333 | 105.1003 | 0.2030 | **1** |
| 15 h | 0.03180 | 0.0377 | 105.3255 | 0.8430 | **0.98** |
| 16 h | -0.00269 | 0.0333 | 105.1003 | -0.0810 | **1** |
| 17 h | -0.00720 | 0.0377 | 105.3255 | -0.1910 | **1** |
| 18 h | 0.01980 | 0.0333 | 105.1003 | 0.5940 | **1** |
| 19 h | 0.01750 | 0.0377 | 105.3255 | 0.4640 | **1** |
| 20 h | 0.02950 | 0.0333 | 105.1003 | 0.8860 | **0.98** |
| 21 h | -0.00579 | 0.0377 | 105.3255 | -0.1530 | **1** |
| 22 h | 0.01640 | 0.0351 | 105.2177 | 0.4680 | **1** |

**Table S6** *Cont*

| Post-hoc Dunnett Test — Choroid Plexus (ChP) | | | | | |
| --- | --- | --- | --- | --- | --- |
| Comparison | Mean Difference | Std. Error | DF | t-value | p-value |
| 0.3 h | -0.14500 | 0.0318 | 105.0015 | -4.560 | **<0.001** |
| 1 h | -0.16700 | 0.0376 | 105.2311 | -4.440 | **<0.001** |
| 2 h | -0.08760 | 0.0318 | 105.0015 | -2.760 | **0.1** |
| 3 h | -0.05810 | 0.0350 | 105.1977 | -1.660 | **0.68** |
| 4 h | 0.00837 | 0.0318 | 105.0015 | 0.263 | **1** |
| 5 h | 0.01370 | 0.0350 | 105.1977 | 0.390 | **1** |
| 6 h | 0.03640 | 0.0318 | 105.0015 | 1.150 | **0.93** |
| 7 h | 0.06840 | 0.0350 | 105.1977 | 1.950 | **0.48** |
| 8 h | 0.06700 | 0.0318 | 105.0015 | 2.110 | **0.38** |
| 9 h | 0.06820 | 0.0350 | 105.1977 | 1.940 | **0.49** |
| 10 h | 0.08620 | 0.0318 | 105.0015 | 2.710 | **0.12** |
| 11 h | 0.10900 | 0.0350 | 105.1977 | 3.100 | **<0.05** |
| 12 h | 0.09470 | 0.0318 | 105.0015 | 2.980 | **0.059** |
| 13 h | 0.08920 | 0.0350 | 105.1977 | 2.540 | **0.17** |
| 14 h | 0.10300 | 0.0332 | 105.0706 | 3.100 | **<0.05** |
| 15 h | 0.11700 | 0.0376 | 105.2306 | 3.110 | **<0.05** |
| 16 h | 0.09670 | 0.0332 | 105.0706 | 2.920 | **0.069** |
| 17 h | 0.08630 | 0.0376 | 105.2306 | 2.300 | **0.28** |
| 18 h | 0.10700 | 0.0332 | 105.0706 | 3.210 | **<0.05** |
| 19 h | 0.08860 | 0.0376 | 105.2306 | 2.360 | **0.25** |
| 20 h | 0.08360 | 0.0332 | 105.0706 | 2.520 | **0.18** |
| 21 h | 0.07020 | 0.0376 | 105.2306 | 1.870 | **0.54** |
| 22 h | 0.08690 | 0.0350 | 105.1542 | 2.480 | **0.19** |

**Table S6** *Cont*

| Post-hoc Dunnett Test — Corpus Callosum (CC) | | | | | |
| --- | --- | --- | --- | --- | --- |
| Comparison | Mean Difference | Std. Error | DF | t-value | p-value |
| 0.3 h | 0.021000 | 0.00938 | 105.0005 | 2.2300 | **0.31** |
| 1 h | -0.001580 | 0.01110 | 105.1366 | -0.1420 | **1** |
| 2 h | 0.019600 | 0.00938 | 105.0005 | 2.0900 | **0.39** |
| 3 h | 0.017100 | 0.01030 | 105.1172 | 1.6500 | **0.68** |
| 4 h | 0.025300 | 0.00938 | 105.0005 | 2.6900 | **0.12** |
| 5 h | 0.019100 | 0.01030 | 105.1172 | 1.8500 | **0.55** |
| 6 h | 0.016000 | 0.00938 | 105.0005 | 1.7100 | **0.65** |
| 7 h | 0.023800 | 0.01030 | 105.1172 | 2.3000 | **0.28** |
| 8 h | 0.019800 | 0.00938 | 105.0005 | 2.1100 | **0.38** |
| 9 h | 0.017600 | 0.01030 | 105.1172 | 1.7000 | **0.65** |
| 10 h | 0.018700 | 0.00938 | 105.0005 | 1.9900 | **0.46** |
| 11 h | 0.039900 | 0.01030 | 105.1172 | 3.8600 | **<0.01** |
| 12 h | 0.014900 | 0.00938 | 105.0005 | 1.5900 | **0.72** |
| 13 h | 0.007250 | 0.01030 | 105.1172 | 0.7010 | **0.99** |
| 14 h | 0.010100 | 0.00979 | 105.0412 | 1.0300 | **0.96** |
| 15 h | 0.027400 | 0.01110 | 105.1357 | 2.4700 | **0.2** |
| 16 h | 0.014200 | 0.00979 | 105.0412 | 1.4500 | **0.8** |
| 17 h | 0.000393 | 0.01110 | 105.1357 | 0.0354 | **1** |
| 18 h | 0.016000 | 0.00979 | 105.0412 | 1.6300 | **0.69** |
| 19 h | 0.003280 | 0.01110 | 105.1357 | 0.2950 | **1** |
| 20 h | 0.009530 | 0.00979 | 105.0412 | 0.9740 | **0.97** |
| 21 h | 0.002690 | 0.01110 | 105.1357 | 0.2420 | **1** |
| 22 h | 0.015300 | 0.01030 | 105.0907 | 1.4800 | **0.79** |

**Table S6** *Cont*

| Post-hoc Dunnett Test — Basal Ganglia (BG) | | | | | |
| --- | --- | --- | --- | --- | --- |
| Comparison | Mean Difference | Std. Error | DF | t-value | p-value |
| 0.3 h | -0.027200 | 0.0103 | 105.0001 | -2.6400 | **0.13** |
| 1 h | -0.035400 | 0.0122 | 105.0701 | -2.9100 | **0.07** |
| 2 h | -0.007640 | 0.0103 | 105.0001 | -0.7440 | **0.99** |
| 3 h | 0.000180 | 0.0113 | 105.0603 | 0.0159 | **1** |
| 4 h | 0.013900 | 0.0103 | 105.0001 | 1.3600 | **0.85** |
| 5 h | 0.011900 | 0.0113 | 105.0603 | 1.0500 | **0.95** |
| 6 h | 0.014200 | 0.0103 | 105.0001 | 1.3900 | **0.83** |
| 7 h | 0.015400 | 0.0113 | 105.0603 | 1.3600 | **0.85** |
| 8 h | 0.018800 | 0.0103 | 105.0001 | 1.8300 | **0.57** |
| 9 h | 0.011200 | 0.0113 | 105.0603 | 0.9920 | **0.96** |
| 10 h | 0.019600 | 0.0103 | 105.0001 | 1.9100 | **0.51** |
| 11 h | 0.040000 | 0.0113 | 105.0603 | 3.5300 | **<0.05** |
| 12 h | 0.010600 | 0.0103 | 105.0001 | 1.0300 | **0.96** |
| 13 h | 0.004920 | 0.0113 | 105.0603 | 0.4340 | **1** |
| 14 h | 0.011400 | 0.0107 | 105.0210 | 1.0700 | **0.95** |
| 15 h | 0.026300 | 0.0122 | 105.0694 | 2.1600 | **0.35** |
| 16 h | 0.011400 | 0.0107 | 105.0210 | 1.0700 | **0.95** |
| 17 h | 0.004420 | 0.0122 | 105.0694 | 0.3640 | **1** |
| 18 h | 0.015500 | 0.0107 | 105.0210 | 1.4500 | **0.8** |
| 19 h | -0.000786 | 0.0122 | 105.0694 | -0.0647 | **1** |
| 20 h | 0.002100 | 0.0107 | 105.0210 | 0.1960 | **1** |
| 21 h | -0.004000 | 0.0122 | 105.0694 | -0.3290 | **1** |
| 22 h | 0.013200 | 0.0113 | 105.0464 | 1.1600 | **0.92** |

**Table S6** *Cont*

| Post-hoc Dunnett Test — Frontal GM | | | | | |
| --- | --- | --- | --- | --- | --- |
| Comparison | Mean Difference | Std. Error | DF | t-value | p-value |
| 0.3 h | -0.081700 | 0.00855 | 105.0016 | -9.560 | **<0.001** |
| 1 h | -0.080100 | 0.01010 | 105.2372 | -7.930 | **<0.001** |
| 2 h | -0.039700 | 0.00855 | 105.0016 | -4.650 | **<0.001** |
| 3 h | -0.023800 | 0.00942 | 105.2029 | -2.530 | **0.17** |
| 4 h | -0.004470 | 0.00855 | 105.0016 | -0.524 | **1** |
| 5 h | -0.016800 | 0.00942 | 105.2029 | -1.790 | **0.59** |
| 6 h | -0.004320 | 0.00855 | 105.0016 | -0.506 | **1** |
| 7 h | -0.002470 | 0.00942 | 105.2029 | -0.262 | **1** |
| 8 h | 0.002330 | 0.00855 | 105.0016 | 0.273 | **1** |
| 9 h | 0.005520 | 0.00942 | 105.2029 | 0.586 | **1** |
| 10 h | -0.000952 | 0.00855 | 105.0016 | -0.111 | **1** |
| 11 h | 0.019100 | 0.00942 | 105.2029 | 2.030 | **0.43** |
| 12 h | -0.003830 | 0.00855 | 105.0016 | -0.448 | **1** |
| 13 h | -0.004540 | 0.00942 | 105.2029 | -0.482 | **1** |
| 14 h | -0.006720 | 0.00892 | 105.0725 | -0.754 | **0.99** |
| 15 h | 0.020100 | 0.01010 | 105.2367 | 1.990 | **0.46** |
| 16 h | -0.011700 | 0.00892 | 105.0725 | -1.310 | **0.87** |
| 17 h | -0.019900 | 0.01010 | 105.2367 | -1.970 | **0.47** |
| 18 h | -0.001630 | 0.00892 | 105.0725 | -0.182 | **1** |
| 19 h | 0.003740 | 0.01010 | 105.2367 | 0.370 | **1** |
| 20 h | -0.013500 | 0.00892 | 105.0725 | -1.510 | **0.77** |
| 21 h | -0.011700 | 0.01010 | 105.2367 | -1.150 | **0.92** |
| 22 h | -0.009340 | 0.00942 | 105.1583 | -0.992 | **0.96** |

**Table S6** *Cont*

| Post-hoc Dunnett Test — Occipital GM | | | | | |
| --- | --- | --- | --- | --- | --- |
| Comparison | Mean Difference | Std. Error | DF | t-value | p-value |
| 0.3 h | -0.208000 | 0.0149 | 105.0072 | -14.0000 | **<0.001** |
| 1 h | -0.172000 | 0.0176 | 105.4872 | -9.7800 | **<0.001** |
| 2 h | -0.094200 | 0.0149 | 105.0072 | -6.3200 | **<0.001** |
| 3 h | -0.080700 | 0.0164 | 105.4127 | -4.9200 | **<0.001** |
| 4 h | -0.043600 | 0.0149 | 105.0072 | -2.9200 | **0.068** |
| 5 h | -0.027900 | 0.0164 | 105.4127 | -1.7000 | **0.65** |
| 6 h | -0.025700 | 0.0149 | 105.0072 | -1.7300 | **0.63** |
| 7 h | -0.012900 | 0.0164 | 105.4127 | -0.7830 | **0.99** |
| 8 h | -0.005920 | 0.0149 | 105.0072 | -0.3970 | **1** |
| 9 h | -0.013600 | 0.0164 | 105.4127 | -0.8290 | **0.99** |
| 10 h | -0.000424 | 0.0149 | 105.0072 | -0.0284 | **1** |
| 11 h | 0.008810 | 0.0164 | 105.4127 | 0.5370 | **1** |
| 12 h | -0.004960 | 0.0149 | 105.0072 | -0.3330 | **1** |
| 13 h | -0.013600 | 0.0164 | 105.4127 | -0.8280 | **0.99** |
| 14 h | -0.012000 | 0.0155 | 105.1536 | -0.7720 | **0.99** |
| 15 h | -0.011600 | 0.0176 | 105.4918 | -0.6560 | **1** |
| 16 h | -0.029400 | 0.0155 | 105.1536 | -1.8900 | **0.52** |
| 17 h | -0.030000 | 0.0176 | 105.4918 | -1.7000 | **0.65** |
| 18 h | -0.000495 | 0.0155 | 105.1536 | -0.0318 | **1** |
| 19 h | -0.006480 | 0.0176 | 105.4918 | -0.3680 | **1** |
| 20 h | -0.011700 | 0.0155 | 105.1536 | -0.7510 | **0.99** |
| 21 h | -0.022900 | 0.0176 | 105.4918 | -1.3000 | **0.87** |
| 22 h | -0.004320 | 0.0164 | 105.3293 | -0.2630 | **1** |

**Table S5** *Cont*

| Post-hoc Dunnett Test — Parietal GM | | | | | |
| --- | --- | --- | --- | --- | --- |
| Comparison | Mean Difference | Std. Error | DF | t-value | p-value |
| 0.3 h | -0.09470 | 0.0107 | 105.0133 | -8.870 | **<0.001** |
| 1 h | -0.08520 | 0.0126 | 105.6485 | -6.740 | **<0.001** |
| 2 h | -0.04040 | 0.0107 | 105.0133 | -3.780 | **<0.01** |
| 3 h | -0.02450 | 0.0118 | 105.5454 | -2.080 | **0.4** |
| 4 h | -0.00354 | 0.0107 | 105.0133 | -0.331 | **1** |
| 5 h | -0.00846 | 0.0118 | 105.5454 | -0.718 | **0.99** |
| 6 h | -0.00666 | 0.0107 | 105.0133 | -0.623 | **1** |
| 7 h | 0.00125 | 0.0118 | 105.5454 | 0.106 | **1** |
| 8 h | 0.00623 | 0.0107 | 105.0133 | 0.583 | **1** |
| 9 h | 0.00792 | 0.0118 | 105.5454 | 0.673 | **1** |
| 10 h | 0.00794 | 0.0107 | 105.0133 | 0.743 | **0.99** |
| 11 h | 0.02410 | 0.0118 | 105.5454 | 2.040 | **0.42** |
| 12 h | 0.00170 | 0.0107 | 105.0133 | 0.159 | **1** |
| 13 h | 0.00185 | 0.0118 | 105.5454 | 0.157 | **1** |
| 14 h | 0.00115 | 0.0112 | 105.2085 | 0.103 | **1** |
| 15 h | 0.01450 | 0.0126 | 105.6590 | 1.140 | **0.93** |
| 16 h | -0.00996 | 0.0112 | 105.2085 | -0.894 | **0.98** |
| 17 h | -0.00797 | 0.0126 | 105.6590 | -0.631 | **1** |
| 18 h | 0.00459 | 0.0112 | 105.2085 | 0.411 | **1** |
| 19 h | 0.00294 | 0.0126 | 105.6590 | 0.233 | **1** |
| 20 h | -0.00573 | 0.0112 | 105.2085 | -0.514 | **1** |
| 21 h | -0.01090 | 0.0126 | 105.6590 | -0.861 | **0.98** |
| 22 h | 0.00552 | 0.0118 | 105.4416 | 0.469 | **1** |

**Table S6** *Cont*

| Post-hoc Dunnett Test — Insula GM | | | | | |
| --- | --- | --- | --- | --- | --- |
| Comparison | Mean Difference | Std. Error | DF | t-value | p-value |
| 0.3 h | -0.0789000 | 0.0110 | 105.0014 | -7.1600 | **<0.001** |
| 1 h | -0.0820000 | 0.0130 | 105.2203 | -6.2900 | **<0.001** |
| 2 h | -0.0421000 | 0.0110 | 105.0014 | -3.8200 | **<0.01** |
| 3 h | -0.0251000 | 0.0121 | 105.1886 | -2.0700 | **0.41** |
| 4 h | -0.0061800 | 0.0110 | 105.0014 | -0.5610 | **1** |
| 5 h | -0.0138000 | 0.0121 | 105.1886 | -1.1400 | **0.93** |
| 6 h | -0.0134000 | 0.0110 | 105.0014 | -1.2200 | **0.9** |
| 7 h | -0.0015900 | 0.0121 | 105.1886 | -0.1310 | **1** |
| 8 h | -0.0000276 | 0.0110 | 105.0014 | -0.0025 | **1** |
| 9 h | -0.0023300 | 0.0121 | 105.1886 | -0.1920 | **1** |
| 10 h | -0.0006960 | 0.0110 | 105.0014 | -0.0631 | **1** |
| 11 h | 0.0190000 | 0.0121 | 105.1886 | 1.5700 | **0.74** |
| 12 h | -0.0049500 | 0.0110 | 105.0014 | -0.4490 | **1** |
| 13 h | -0.0100000 | 0.0121 | 105.1886 | -0.8260 | **0.99** |
| 14 h | -0.0048600 | 0.0115 | 105.0672 | -0.4230 | **1** |
| 15 h | 0.0107000 | 0.0130 | 105.2198 | 0.8220 | **0.99** |
| 16 h | -0.0107000 | 0.0115 | 105.0672 | -0.9340 | **0.97** |
| 17 h | -0.0186000 | 0.0130 | 105.2198 | -1.4300 | **0.81** |
| 18 h | 0.0007060 | 0.0115 | 105.0672 | 0.0614 | **1** |
| 19 h | -0.0116000 | 0.0130 | 105.2198 | -0.8900 | **0.98** |
| 20 h | -0.0178000 | 0.0115 | 105.0672 | -1.5500 | **0.74** |
| 21 h | -0.0254000 | 0.0130 | 105.2198 | -1.9500 | **0.48** |
| 22 h | -0.0031200 | 0.0121 | 105.1469 | -0.2570 | **1** |

**Table S6** *Cont*

| Post-hoc Dunnett Test — Temporal GM | | | | | |
| --- | --- | --- | --- | --- | --- |
| Comparison | Mean Difference | Std. Error | DF | t-value | p-value |
| 0.3 h | -0.0851000 | 0.00996 | 105.0021 | -8.55000 | **<0.001** |
| 1 h | -0.0765000 | 0.01180 | 105.2699 | -6.50000 | **<0.001** |
| 2 h | -0.0395000 | 0.00996 | 105.0021 | -3.97000 | **<0.01** |
| 3 h | -0.0267000 | 0.01100 | 105.2306 | -2.43000 | **0.21** |
| 4 h | -0.0106000 | 0.00996 | 105.0021 | -1.06000 | **0.95** |
| 5 h | -0.0063800 | 0.01100 | 105.2306 | -0.58100 | **1** |
| 6 h | -0.0079800 | 0.00996 | 105.0021 | -0.80100 | **0.99** |
| 7 h | 0.0035200 | 0.01100 | 105.2306 | 0.32100 | **1** |
| 8 h | -0.0001250 | 0.00996 | 105.0021 | -0.01260 | **1** |
| 9 h | -0.0023500 | 0.01100 | 105.2306 | -0.21400 | **1** |
| 10 h | -0.0004780 | 0.00996 | 105.0021 | -0.04800 | **1** |
| 11 h | 0.0155000 | 0.01100 | 105.2306 | 1.41000 | **0.82** |
| 12 h | -0.0011300 | 0.00996 | 105.0021 | -0.11400 | **1** |
| 13 h | -0.0070300 | 0.01100 | 105.2306 | -0.64000 | **1** |
| 14 h | -0.0017300 | 0.01040 | 105.0829 | -0.16600 | **1** |
| 15 h | 0.0000675 | 0.01180 | 105.2699 | 0.00573 | **1** |
| 16 h | -0.0095300 | 0.01040 | 105.0829 | -0.91700 | **0.98** |
| 17 h | -0.0175000 | 0.01180 | 105.2699 | -1.48000 | **0.78** |
| 18 h | -0.0044400 | 0.01040 | 105.0829 | -0.42800 | **1** |
| 19 h | -0.0149000 | 0.01180 | 105.2699 | -1.27000 | **0.89** |
| 20 h | -0.0121000 | 0.01040 | 105.0829 | -1.17000 | **0.92** |
| 21 h | -0.0204000 | 0.01180 | 105.2699 | -1.74000 | **0.63** |
| 22 h | -0.0048300 | 0.01100 | 105.1805 | -0.44000 | **1** |

**Table S6** *Cont*

| Post-hoc Dunnett Test — 3rd Ventricle (3V) | | | | | |
| --- | --- | --- | --- | --- | --- |
| Comparison | Mean Difference | Std. Error | DF | t-value | p-value |
| 0.3 h | -0.1620 | 0.0405 | 105.0006 | -3.99 | **<0.01** |
| 1 h | -0.1320 | 0.0480 | 105.1469 | -2.75 | **0.1** |
| 2 h | -0.1280 | 0.0405 | 105.0006 | -3.15 | **<0.05** |
| 3 h | -0.0997 | 0.0447 | 105.1261 | -2.23 | **0.31** |
| 4 h | -0.0922 | 0.0405 | 105.0006 | -2.27 | **0.29** |
| 5 h | -0.0663 | 0.0447 | 105.1261 | -1.48 | **0.78** |
| 6 h | -0.1440 | 0.0405 | 105.0006 | -3.56 | **<0.05** |
| 7 h | -0.1070 | 0.0447 | 105.1261 | -2.39 | **0.23** |
| 8 h | -0.1390 | 0.0405 | 105.0006 | -3.44 | **<0.05** |
| 9 h | -0.1690 | 0.0447 | 105.1261 | -3.78 | **<0.01** |
| 10 h | -0.1200 | 0.0405 | 105.0006 | -2.97 | **0.061** |
| 11 h | -0.1210 | 0.0447 | 105.1261 | -2.71 | **0.11** |
| 12 h | -0.0980 | 0.0405 | 105.0006 | -2.42 | **0.22** |
| 13 h | -0.1380 | 0.0447 | 105.1261 | -3.10 | **<0.05** |
| 14 h | -0.1260 | 0.0423 | 105.0444 | -2.98 | **0.059** |
| 15 h | -0.1060 | 0.0480 | 105.1460 | -2.22 | **0.32** |
| 16 h | -0.1200 | 0.0423 | 105.0444 | -2.85 | **0.083** |
| 17 h | -0.1120 | 0.0480 | 105.1460 | -2.33 | **0.26** |
| 18 h | -0.1150 | 0.0423 | 105.0444 | -2.73 | **0.11** |
| 19 h | -0.1420 | 0.0480 | 105.1460 | -2.96 | **0.062** |
| 20 h | -0.1060 | 0.0423 | 105.0444 | -2.51 | **0.18** |
| 21 h | -0.1180 | 0.0480 | 105.1460 | -2.46 | **0.2** |
| 22 h | -0.1040 | 0.0447 | 105.0976 | -2.32 | **0.26** |

| Post-hoc Dunnett Test — 4th Ventricle (4V) | | | | | |
| --- | --- | --- | --- | --- | --- |
| Comparison | Mean Difference | Std. Error | DF | t-value | p-value |
| 0.3 h | -0.03410 | 0.0194 | 105.0725 | -1.7500 | **0.62** |
| 1 h | -0.05950 | 0.0230 | 106.3893 | -2.5900 | **0.15** |
| 2 h | -0.01830 | 0.0194 | 105.0725 | -0.9390 | **0.97** |
| 3 h | -0.00876 | 0.0214 | 106.1226 | -0.4090 | **1.00** |
| 4 h | -0.01010 | 0.0194 | 105.0725 | -0.5210 | **1.00** |
| 5 h | 0.00142 | 0.0214 | 106.1226 | 0.0663 | **1.00** |
| 6 h | -0.02690 | 0.0194 | 105.0725 | -1.3800 | **0.83** |
| 7 h | -0.00544 | 0.0214 | 106.1226 | -0.2540 | **1.00** |
| 8 h | -0.02610 | 0.0194 | 105.0725 | -1.3400 | **0.85** |
| 9 h | -0.02720 | 0.0214 | 106.1226 | -1.2700 | **0.88** |
| 10 h | -0.04750 | 0.0194 | 105.0725 | -2.4500 | **0.21** |
| 11 h | -0.04560 | 0.0214 | 106.1226 | -2.1300 | **0.37** |
| 12 h | -0.01340 | 0.0194 | 105.0725 | -0.6910 | **0.99** |
| 13 h | -0.01880 | 0.0214 | 106.1226 | -0.8760 | **0.98** |
| 14 h | -0.01460 | 0.0203 | 105.4899 | -0.7220 | **0.99** |
| 15 h | -0.04010 | 0.0230 | 106.4437 | -1.7400 | **0.62** |
| 16 h | -0.02000 | 0.0203 | 105.4899 | -0.9880 | **0.96** |
| 17 h | -0.02650 | 0.0230 | 106.4437 | -1.1600 | **0.92** |
| 18 h | -0.01670 | 0.0203 | 105.4899 | -0.8260 | **0.99** |
| 19 h | -0.01350 | 0.0230 | 106.4437 | -0.5870 | **1.00** |
| 20 h | -0.02080 | 0.0203 | 105.4899 | -1.0200 | **0.96** |
| 21 h | -0.05830 | 0.0230 | 106.4437 | -2.5400 | **0.17** |
| 22 h | -0.00638 | 0.0214 | 105.9741 | -0.2980 | **1.00** |

**Table S6** *Cont*

| Post-hoc Dunnett Test — Cortical Bridging Veins (CV) | | | | | |
| --- | --- | --- | --- | --- | --- |
| Comparison | Mean Difference | Std. Error | DF | t-value | p-value |
| 0.3 h | -0.41800 | 0.0228 | 105.0001 | -18.300 | **<0.001** |
| 1 h | -0.37100 | 0.0270 | 105.0713 | -13.700 | **<0.001** |
| 2 h | -0.21700 | 0.0228 | 105.0001 | -9.520 | **<0.001** |
| 3 h | -0.14900 | 0.0252 | 105.0613 | -5.930 | **<0.001** |
| 4 h | -0.06280 | 0.0228 | 105.0001 | -2.750 | **0.1** |
| 5 h | -0.04680 | 0.0252 | 105.0613 | -1.860 | **0.54** |
| 6 h | -0.00369 | 0.0228 | 105.0001 | -0.162 | **1** |
| 7 h | 0.02610 | 0.0252 | 105.0613 | 1.040 | **0.95** |
| 8 h | 0.05350 | 0.0228 | 105.0001 | 2.350 | **0.25** |
| 9 h | 0.06560 | 0.0252 | 105.0613 | 2.610 | **0.15** |
| 10 h | 0.05990 | 0.0228 | 105.0001 | 2.630 | **0.14** |
| 11 h | 0.08410 | 0.0252 | 105.0613 | 3.340 | **<0.05** |
| 12 h | 0.06350 | 0.0228 | 105.0001 | 2.780 | **0.097** |
| 13 h | 0.07980 | 0.0252 | 105.0613 | 3.170 | **<0.05** |
| 14 h | 0.06430 | 0.0238 | 105.0214 | 2.700 | **0.12** |
| 15 h | 0.11000 | 0.0270 | 105.0706 | 4.070 | **<0.01** |
| 16 h | 0.04980 | 0.0238 | 105.0214 | 2.090 | **0.39** |
| 17 h | 0.05080 | 0.0270 | 105.0706 | 1.880 | **0.53** |
| 18 h | 0.06840 | 0.0238 | 105.0214 | 2.870 | **0.078** |
| 19 h | 0.08370 | 0.0270 | 105.0706 | 3.100 | **<0.05** |
| 20 h | 0.05070 | 0.0238 | 105.0214 | 2.130 | **0.37** |
| 21 h | 0.05370 | 0.0270 | 105.0706 | 1.990 | **0.46** |
| 22 h | 0.06280 | 0.0251 | 105.0472 | 2.500 | **0.19** |

**Table S6** *Cont*

| Post-hoc Dunnett Test — CSF around CV | | | | | |
| --- | --- | --- | --- | --- | --- |
| Comparison | Mean Difference | Std. Error | DF | t-value | p-value |
| 0.3 h | -0.1100 | 0.0138 | 105.0111 | -7.97 | **<0.001** |
| 1 h | -0.1010 | 0.0163 | 105.5970 | -6.22 | **<0.001** |
| 2 h | -0.0630 | 0.0138 | 105.0111 | -4.57 | **<0.001** |
| 3 h | -0.0591 | 0.0152 | 105.5032 | -3.89 | **<0.01** |
| 4 h | -0.0391 | 0.0138 | 105.0111 | -2.84 | **0.085** |
| 5 h | -0.0692 | 0.0152 | 105.5032 | -4.56 | **<0.001** |
| 6 h | -0.0423 | 0.0138 | 105.0111 | -3.07 | **<0.05** |
| 7 h | -0.0466 | 0.0152 | 105.5032 | -3.07 | **<0.05** |
| 8 h | -0.0401 | 0.0138 | 105.0111 | -2.91 | **0.07** |
| 9 h | -0.0357 | 0.0152 | 105.5032 | -2.35 | **0.25** |
| 10 h | -0.0452 | 0.0138 | 105.0111 | -3.28 | **<0.05** |
| 11 h | -0.0521 | 0.0152 | 105.5032 | -3.43 | **<0.05** |
| 12 h | -0.0402 | 0.0138 | 105.0111 | -2.92 | **0.068** |
| 13 h | -0.0403 | 0.0152 | 105.5032 | -2.66 | **0.13** |
| 14 h | -0.0449 | 0.0144 | 105.1907 | -3.12 | **<0.05** |
| 15 h | -0.0240 | 0.0163 | 105.6053 | -1.47 | **0.79** |
| 16 h | -0.0890 | 0.0144 | 105.1907 | -6.20 | **<0.001** |
| 17 h | -0.0681 | 0.0163 | 105.6053 | -4.18 | **<0.01** |
| 18 h | -0.0590 | 0.0144 | 105.1907 | -4.10 | **<0.01** |
| 19 h | -0.0344 | 0.0163 | 105.6053 | -2.11 | **0.38** |
| 20 h | -0.0536 | 0.0144 | 105.1907 | -3.73 | **<0.01** |
| 21 h | -0.0411 | 0.0163 | 105.6053 | -2.52 | **0.18** |
| 22 h | -0.0408 | 0.0152 | 105.4055 | -2.69 | **0.12** |

**Table S6** *Cont*

| Post-hoc Dunnett Test — GM around CV | | | | | |
| --- | --- | --- | --- | --- | --- |
| Comparison | Mean Difference | Std. Error | DF | t-value | p-value |
| 0.3 h | -0.08510 | 0.00934 | 105.0153 | -9.110 | **<0.001** |
| 1 h | -0.07810 | 0.01100 | 105.6920 | -7.080 | **<0.001** |
| 2 h | -0.03760 | 0.00934 | 105.0153 | -4.020 | **<0.01** |
| 3 h | -0.01530 | 0.01030 | 105.5808 | -1.490 | **0.78** |
| 4 h | 0.00538 | 0.00934 | 105.0153 | 0.576 | **1** |
| 5 h | -0.00313 | 0.01030 | 105.5808 | -0.304 | **1** |
| 6 h | 0.00515 | 0.00934 | 105.0153 | 0.552 | **1** |
| 7 h | 0.01010 | 0.01030 | 105.5808 | 0.986 | **0.96** |
| 8 h | 0.01700 | 0.00934 | 105.0153 | 1.820 | **0.57** |
| 9 h | 0.02040 | 0.01030 | 105.5808 | 1.980 | **0.46** |
| 10 h | 0.01620 | 0.00934 | 105.0153 | 1.730 | **0.63** |
| 11 h | 0.03170 | 0.01030 | 105.5808 | 3.080 | **<0.05** |
| 12 h | 0.01120 | 0.00934 | 105.0153 | 1.200 | **0.91** |
| 13 h | 0.00926 | 0.01030 | 105.5808 | 0.900 | **0.98** |
| 14 h | 0.00867 | 0.00974 | 105.2237 | 0.890 | **0.98** |
| 15 h | 0.03860 | 0.01100 | 105.7044 | 3.490 | **<0.05** |
| 16 h | 0.00513 | 0.00974 | 105.2237 | 0.526 | **1** |
| 17 h | 0.00320 | 0.01100 | 105.7044 | 0.290 | **1** |
| 18 h | 0.01310 | 0.00974 | 105.2237 | 1.350 | **0.85** |
| 19 h | 0.02780 | 0.01100 | 105.7044 | 2.520 | **0.18** |
| 20 h | 0.00989 | 0.00974 | 105.2237 | 1.020 | **0.96** |
| 21 h | 0.01030 | 0.01100 | 105.7044 | 0.936 | **0.97** |
| 22 h | 0.01350 | 0.01030 | 105.4722 | 1.310 | **0.87** |

**Table S6** *Cont*

| Post-hoc Dunnett Test — Optic Nerve | | | | | |
| --- | --- | --- | --- | --- | --- |
| Comparison | Mean Difference | Std. Error | DF | t-value | p-value |
| 0.3 h | -0.636 | 0.0821 | 105.0018 | -7.75 | **<0.001** |
| 1 h | -0.626 | 0.0971 | 105.2475 | -6.44 | **<0.001** |
| 2 h | -0.669 | 0.0821 | 105.0018 | -8.15 | **<0.001** |
| 3 h | -0.597 | 0.0905 | 105.2116 | -6.60 | **<0.001** |
| 4 h | -0.588 | 0.0821 | 105.0018 | -7.16 | **<0.001** |
| 5 h | -0.568 | 0.0905 | 105.2116 | -6.27 | **<0.001** |
| 6 h | -0.531 | 0.0821 | 105.0018 | -6.47 | **<0.001** |
| 7 h | -0.514 | 0.0905 | 105.2116 | -5.67 | **<0.001** |
| 8 h | -0.421 | 0.0821 | 105.0018 | -5.13 | **<0.001** |
| 9 h | -0.334 | 0.0905 | 105.2116 | -3.68 | **<0.01** |
| 10 h | -0.382 | 0.0821 | 105.0018 | -4.65 | **<0.001** |
| 11 h | -0.390 | 0.0905 | 105.2116 | -4.31 | **<0.001** |
| 12 h | -0.348 | 0.0821 | 105.0018 | -4.24 | **<0.01** |
| 13 h | -0.369 | 0.0905 | 105.2116 | -4.07 | **<0.01** |
| 14 h | -0.285 | 0.0857 | 105.0758 | -3.32 | **<0.05** |
| 15 h | -0.234 | 0.0972 | 105.2472 | -2.41 | **0.23** |
| 16 h | -0.355 | 0.0857 | 105.0758 | -4.15 | **<0.01** |
| 17 h | -0.379 | 0.0972 | 105.2472 | -3.90 | **<0.01** |
| 18 h | -0.421 | 0.0857 | 105.0758 | -4.92 | **<0.001** |
| 19 h | -0.340 | 0.0972 | 105.2472 | -3.50 | **<0.05** |
| 20 h | -0.390 | 0.0857 | 105.0758 | -4.55 | **<0.001** |
| 21 h | -0.524 | 0.0972 | 105.2472 | -5.39 | **<0.001** |
| 22 h | -0.423 | 0.0905 | 105.1653 | -4.68 | **<0.001** |

**Table S6** *Cont*

| Post-hoc Dunnett Test — Trigeminal Nerve Cave | | | | | |
| --- | --- | --- | --- | --- | --- |
| Comparison | Mean Difference | Std. Error | DF | t-value | p-value |
| 0.3 h | -0.2210 | 0.0327 | 105.0010 | -6.75 | **<0.001** |
| 1 h | -0.1560 | 0.0387 | 105.1876 | -4.05 | **<0.01** |
| 2 h | -0.1820 | 0.0327 | 105.0010 | -5.57 | **<0.001** |
| 3 h | -0.1410 | 0.0361 | 105.1608 | -3.92 | **<0.01** |
| 4 h | -0.1350 | 0.0327 | 105.0010 | -4.12 | **<0.01** |
| 5 h | -0.1620 | 0.0361 | 105.1608 | -4.50 | **<0.001** |
| 6 h | -0.1250 | 0.0327 | 105.0010 | -3.83 | **<0.01** |
| 7 h | -0.0915 | 0.0361 | 105.1608 | -2.54 | **0.17** |
| 8 h | -0.1130 | 0.0327 | 105.0010 | -3.45 | **<0.05** |
| 9 h | -0.1220 | 0.0361 | 105.1608 | -3.37 | **<0.05** |
| 10 h | -0.1040 | 0.0327 | 105.0010 | -3.18 | **<0.05** |
| 11 h | -0.0809 | 0.0361 | 105.1608 | -2.24 | **0.31** |
| 12 h | -0.0728 | 0.0327 | 105.0010 | -2.23 | **0.31** |
| 13 h | -0.1230 | 0.0361 | 105.1608 | -3.41 | **<0.05** |
| 14 h | -0.1060 | 0.0341 | 105.0570 | -3.12 | **<0.05** |
| 15 h | -0.1410 | 0.0387 | 105.1868 | -3.64 | **<0.01** |
| 16 h | -0.1470 | 0.0341 | 105.0570 | -4.30 | **<0.001** |
| 17 h | -0.1660 | 0.0387 | 105.1868 | -4.30 | **<0.001** |
| 18 h | -0.1690 | 0.0341 | 105.0570 | -4.96 | **<0.001** |
| 19 h | -0.1290 | 0.0387 | 105.1868 | -3.33 | **<0.05** |
| 20 h | -0.1240 | 0.0341 | 105.0570 | -3.64 | **<0.01** |
| 21 h | -0.1260 | 0.0387 | 105.1868 | -3.25 | **<0.05** |
| 22 h | -0.0996 | 0.0360 | 105.1249 | -2.77 | **0.1** |
